1 **Spatial suppression in visual motion perception is driven by inhibition: evidence**  
2 **from MEG gamma oscillations**

3  
4 Orekhova E.V.<sup>1,2\*</sup>, Rostovtseva E.N.<sup>1</sup>, Manyukhina V.O.<sup>1,3</sup>, Prokofiev A.O.<sup>1</sup>, Obukhova T.S.<sup>1</sup>,  
5 Nikolaeva A. Yu.<sup>1</sup>, Schneiderman J.F.<sup>2</sup>, Stroganova T.A.<sup>1</sup>.

6  
7 1 - Center for Neurocognitive Research (MEG Center), Moscow State University of Psychology and  
8 Education, Moscow, Russian Federation;

9 2 - MedTech West and the Institute of Neuroscience and Physiology, Sahlgrenska Academy, the  
10 University of Gothenburg, Gothenburg, Sweden;

11 3 - National Research University Higher School of Economics, Moscow, Russian Federation, Moscow,  
12 Russian Federation

13 \* Corresponding author

14

15

16

17 *Corresponding author :*

18 Elena V Orekhova, PhD

19 Center for Neurocognitive Research (MEG Center),

20 Moscow State University of Psychology and Education,

21 Shelepihinskaja embankment 2a

22 123290 Moscow, Russia

23

24 Email: orekhova.elena.v@gmail.com, Elena.orekhova@gnc.gu.se

25

26  
27  
28  
29  
30  
31  
32  
33  
34  
35

## Highlights

- The role of surround inhibition in perceptual spatial suppression (SS) is debated
- GR attenuation with increasing grating's velocity may reflect surround inhibition
- People with greater GR attenuation exhibit stronger SS
- The neuro-behavioral correlation is replicated in school-age boys and adult women
- The surround inhibition in the V1 is an important mechanism underlying SS

36 **Abstract**

37  
38 Spatial suppression (SS) is a visual perceptual phenomenon that is manifest in a reduction of  
39 directional sensitivity for drifting high-contrast gratings whose size exceeds the center of the  
40 visual field. Gratings moving at faster velocities induce stronger SS. The neural processes that  
41 give rise to such size- and velocity-dependent reductions in directional sensitivity are currently  
42 unknown, and the role of surround inhibition is unclear. In magnetoencephalogram (MEG), large  
43 high-contrast drifting gratings induce a strong gamma response (GR), which also attenuates with  
44 an increase in the gratings' velocity. It has been suggested that the slope of this GR attenuation is  
45 mediated by inhibitory interactions in the primary visual cortex. Herein, we investigate whether  
46 SS is related to this inhibitory-based MEG measure. We evaluated SS and GR in two independent  
47 samples of participants: school-age boys and adult women. The slope of GR attenuation predicted  
48 inter-individual differences in SS in both samples. Test-retest reliability of the neuro-behavioral  
49 correlation was assessed in the adults, and was high between two sessions separated by several  
50 days or weeks. Neither frequencies nor absolute amplitudes of the GRs correlated with SS, which  
51 highlights the functional relevance of velocity-related *changes* in GR magnitude caused by  
52 augmentation of incoming input. Our findings provide evidence that links the psychophysical  
53 phenomenon of SS to inhibitory-based neural responses in the human primary visual cortex. This  
54 supports the role of inhibitory interactions as an important underlying mechanism for spatial  
55 suppression.

56  
57  
58 *Keywords:* Magnetoencephalography (MEG), gamma oscillations, spatial suppression, surround  
59 suppression, inhibition, IQ

60  
61

## 62 **1. Introduction**

63  
64 Vision is the main source of sensory information in humans. Considering the abundance of visual  
65 information bombarding the brain at any given moment, visual processing is inherently  
66 competitive and requires neural mechanisms that suppress redundant or distracting input  
67 (Desimone and Duncan, 1995). It has been suggested that, for efficient information processing,  
68 the brain applies a so called ‘sparse coding’ strategy, i.e. encoding of sensory information using  
69 small number of active neurons (Baddeley et al., 1997; Barlow, 1961; Field, 1987; Olshausen and  
70 Field, 2004). Surround suppression – weakening of neurons’ responses to the combined  
71 stimulation of their classical receptive fields and surrounding periphery – is an important  
72 mechanism of sparse coding (Angelucci et al., 2017; Angelucci and Bressloff, 2006; Sachdev et al.,  
73 2012; Zhu and Rozell, 2013). In the visual cortex, surround suppression improves coding  
74 efficiency of natural images by promoting figure-ground segmentation of moving objects (Tadin  
75 et al., 2019) and by facilitating the processing of potentially salient peripheral motion (Nurminen  
76 and Angelucci, 2014).

77         These perceptual advantages, however, come at a price, because surround suppression is  
78 thought to lead to diminished directional sensitivity to drifting high-contrast regular shapes, such  
79 as gratings, if these shapes extend beyond the center of the visual field (Tadin, 2015; Tadin et al.,  
80 2003). This visual perceptual phenomenon, called *spatial suppression* (SS), has been found in both  
81 humans (Tadin, 2015; Tadin et al., 2003) and nonhuman primates (Liu et al., 2016). In  
82 psychophysical experiments, SS manifests itself in a longer time needed to discriminate the  
83 direction of motion of large high-contrast gratings, compared to small ones. Reduced SS has been  
84 posited as a behavioral indication of impaired neural surround inhibition in old age (Betts et al.,  
85 2007, 2012; Tadin et al., 2019) and in a number of neuropsychiatric disorders, such as depression  
86 (Golomb et al., 2009), schizophrenia (Tadin et al., 2006) and ASD (Foss-Feig et al., 2013; Sysoeva  
87 et al., 2017). However, the role of neural surround inhibition in SS in humans remains elusive and  
88 is a subject of continuing debate (see e.g. Schallmo et al., 2018).

89         The role of early and higher-tier visual cortical areas in the psychophysical phenomenon  
90 of SS is also unclear. SS has often been attributed to neuronal surround suppression within area  
91 MT (Tadin, 2015; Tadin et al., 2011), which plays a major role in motion direction sensitivity  
92 (Born and Bradley, 2005). Tadin and colleagues have shown that TMS-induced periods of reduced  
93 excitability in MT were associated with weakening of SS, and suggested that such disruptive TMS  
94 is interfering with inhibitory processing within MT/V5, which, in turn, improves perception of  
95 large moving stimuli (Tadin et al., 2011). Contrasting this view, studies in monkeys demonstrate  
96 that the strength of neuronal surround suppression in the MT is low and cannot explain the  
97 reported high level of deterioration in behavioral performance (Liu et al., 2016).

98           A recent human study combining behavioral psychophysics, functional MRI and magnetic  
99 resonance spectroscopy (Schallmo et al., 2018) further challenged the proposed role of  
100 heightened inhibitory transmission within MT in SS. Although increasing the size of moving  
101 gratings did suppress fMRI responses in MT, the suppression was much more subtle than, and  
102 could thus be considered secondary to, that in the primary visual cortex (V1). Further, the authors  
103 did not find the expected direct association between SS measured in a psychophysical task and  
104 the concentration of the inhibitory neurotransmitter GABA in either area MT or the early visual  
105 cortex. In a similar vein, GABA concentration was unrelated to the fMRI response suppression  
106 caused by increasing the size of drifting gratings. Therefore, Schallmo et al. came to the  
107 conclusion that SS is not primarily driven by GABA-mediated inhibition.

108           Given the complex dynamic nature of the excitatory-inhibitory interactions elicited by  
109 large moving gratings that has been revealed in animal studies (Angelucci et al., 2017; Angelucci  
110 and Bressloff, 2006; Nurminen et al., 2018), individual variations in the baseline ‘bulk’ GABA  
111 concentration in visual areas might be only one of many factors contributing to SS. The better  
112 way to clarify the role of GABAergic inhibition in human SS could be to utilize a measure of how  
113 efficiently the ‘*on-demand*’ release of inhibition in V1 follows the increase in excitatory input. This  
114 can be achieved through recording magnetoencephalographic (MEG) visually-induced gamma  
115 oscillations that reflect the fast collective fluctuations in membrane potentials of V1 neurons  
116 (Buzsaki et al., 2012).

117           Cortical inhibition is essential for generation of neural oscillations in the gamma  
118 frequency range - 30-100 Hz (Atallah et al., 2012; Buzsaki and Wang, 2012; Cardin et al., 2009;  
119 Hasenstaub et al., 2005; Sohal et al., 2009; Takada et al., 2014). Recent findings by our group  
120 suggest that the efficiency of inhibitory control in the human V1 is reflected in degree of  
121 *attenuation* of the MEG gamma response (GR) with increasing velocity of large high-contrast  
122 visual gratings (Orekhova et al., 2019; Orekhova et al., 2018b). This GR attenuation was  
123 accompanied by an increase in gamma frequency, which presumably reflects an increase in tonic  
124 excitation of V1 inhibitory neurons (Anver et al., 2011; Mann and Mody, 2010). An important  
125 factor leading to velocity-related attenuation of the MEG GR seems to be changes in bottom-up  
126 and/or top-down excitatory drive to V1 inhibitory cells. Indeed, it has been shown that the ‘too  
127 strong’ drive disrupts gamma synchrony (Borgers and Kopell, 2005; Cannon et al., 2014; King et  
128 al., 2013; Kopell et al., 2010). On the other hand, the resulting asynchronous inhibition especially  
129 effectively weakens the activation of excitatory cells in response to high excitatory input (Borgers  
130 and Kopell, 2005). Therefore, at the individual level, the degree of GR attenuation may reflect how  
131 efficiently neural inhibition mitigates intensive excitatory input to V1 and reduces the network  
132 excitatory response.

133           In the present MEG study, we tested for the link between the degree of motion-related  
134 attenuation of the visual GR and SS in human visual motion perception. We hypothesized that if

135 both GR attenuation and SS reflect the efficiency of surround inhibition in the human visual cortex,  
136 then the interindividual variation in the GR attenuation should mirror changes in directional  
137 sensitivity observed with increasing the size of drifting gratings. Therefore, we predicted that  
138 those individuals who have stronger GR attenuation (i.e., highly efficient down-regulation of V1  
139 excitation) would exhibit worse directional sensitivity *for the large, but not for the small*, moving  
140 gratings. This precise prediction allows us to rule out the other neural factors, e.g., attention  
141 focusing and general motion sensitivity that, unlike surround inhibition, should have a similar  
142 impact on the correlations between GR and psychophysical thresholds for both small and large  
143 gratings. The presence of such a selective correlation would therefore provide strong support for  
144 a causal link between excitatory/inhibitory balance in V1 and the perceptual phenomenon of SS.

145 It has been widely discussed that cognitive neuroscience suffers from a ‘replication crisis’  
146 due to small sample sizes and a bias to publish positive findings (Button et al., 2013; Szucs and  
147 Ioannidis, 2017). To decrease the probability of ‘false-positive’ results in our study, we tested for  
148 the predicted neuro-behavioral correlation in the two diverse samples of individuals. In addition  
149 to previously collected data from school-age children (all boys) (Stroganova et al., 2018), we  
150 performed the same MEG and psychophysical measurements in a sample of adult women. Given  
151 the fundamental nature of the proposed inhibitory-based mechanism, it should influence both  
152 perception and gamma oscillatory dynamics in adults and children irrespective of gender. We  
153 reasoned that apart from testing for reproducibility, replication of the anticipated neuro-  
154 behavioral relationship in these demographically diverse samples would provide a rigorous test  
155 of its functional relevance. To furthermore ensure temporal stability of the target measures, we  
156 also estimated their test/re-test reliability by repeating the measurements on the adult  
157 individuals in two sessions that were separated by at several days or weeks.

158

## 159 **2. Materials and Methods**

160

### 161 **2.1. Participants**

162

163 *Sample 1* included 18 healthy women (aged 18-40 years, mean 28 years) who were a part of  
164 another study. All the participants underwent the psychophysical testing and MEG recording  
165 procedure twice with an interval of 5-118 days (at the follicular and luteal stages of the menstrual  
166 cycle, the stages being counterbalanced between the visits). For the purpose of the present study,  
167 the data obtained during the 1<sup>st</sup> and the 2<sup>nd</sup> visits were averaged except when evaluating test-  
168 retest reliability.

169

170 *Sample 2* initially included 43 typically developing children (all boys aged 6-15 years) who  
171 participated in two other studies (Orekhova et al., 2018b; Sysoeva et al., 2017). In nine of these

172 children, no reliable MEG GRs were detected according to the acceptance criteria (see below),  
173 which prevented reliable estimation of the gamma suppression slope. These children were  
174 excluded from the analysis. The final sample therefore comprised 34 participants (age 7.7-15.5  
175 years, mean=11.4 years). In all of these participants, IQ was assessed using the Kaufman  
176 Assessment Battery for Children K-ABC II (Kaufman and Kaufman, 2004).

177

## 178 **2.2. Psychophysical task**

179 To estimate SS, we used a psychophysical task that has been previously applied in healthy  
180 individuals (Arranz-Paraiso and Serrano-Pedraza, 2018; Betts et al., 2012; Melnick et al., 2013;  
181 Tadin et al., 2003; Troche et al., 2018) as well as in those with neurological or psychiatric  
182 disorders (Foss-Feig et al., 2013; Golomb et al., 2009; Sysoeva et al., 2017; Tadin et al., 2006). A  
183 detailed description of the current version of the experimental procedure is given in the (Sysoeva  
184 et al., 2017).

185 Visual stimuli were presented using PsychToolbox (Brainard, 1997). Figure 1 illustrates  
186 the types of experimental stimuli and the procedure we used. The stimuli consisted of a vertical  
187 full-contrast sine wave grating (1 cycle/°) that drifted at a constant speed of 4 °/s. The size of the  
188 stimuli was controlled by a two-dimensional Gaussian envelope whose full-width at half-  
189 maximum was set to 1, 2.5, or 12° for the small, medium, and large stimuli types. Participants  
190 were instructed to discriminate the direction of motion. An automated staircase procedure was  
191 used in order to estimate the minimal exposure time needed for correct motion direction  
192 discrimination. In adults, we used three types of stimuli (large: 12° of visual angle, medium: 2.5°,  
193 and small: 1° gratings), while only the large and the small gratings were presented to the children.  
194 The direction of visual motion (left or right) was determined randomly for each trial. Participants'  
195 eyes were ~60 cm from the monitor on which stimuli were presented (Benq XL2420T, 24''W  
196 LED, 1,920 Å~ 1,080 resolution, 120 Hz).

197

198 To estimate the strength of SS, we calculated the spatial suppression index (SSI) via:

199

$$200 \text{ SSI} = \log_{10}[\text{Threshold}_{\text{LARGE}}/\text{Threshold}_{\text{SMALL}}]$$

201

202

203

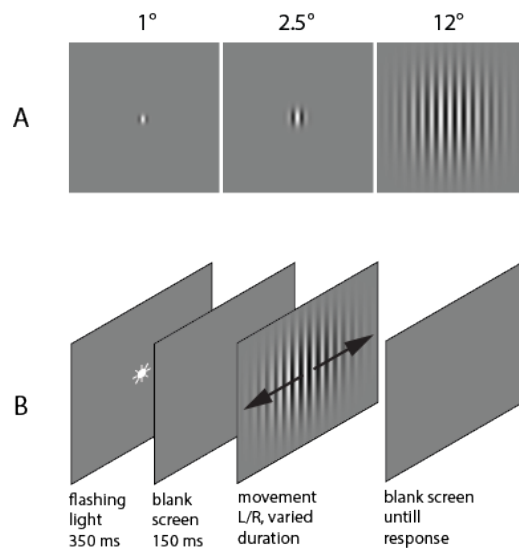

204

205

206

207

208

209

210

211

212

213

214

215

216

217

218

219

220

221

222

223

224

225

226

227

228

229

230

231

*Fig. 1. Psychophysical experiment: stimuli (A) and schematic representation of the experimental paradigm (B).*

The experimental procedure was explained in detail to each participant. Children also performed a short training session before the main experiment. During the experiment, a research assistant that was seated next to the child maintained the correct distance from the monitor, vertical head position, and adequate task performance. Participants were asked to make an un-speeded two-alternative forced-choice response that indicated the perceived right or left direction of motion by pressing the left or right arrows on a keyboard, respectively. The inter-trial interval was 500 ms. In the beginning of each trial, a central dot flickered on the screen (50 ms on, 50 ms off, 250 ms on, 150 ms off) followed by the stimulus presentation.

In children the initial stimulus duration was set to 150 ms and the duration was changed with a fixed step size of 8.3 ms. The duration was further adjusted depending on the participant's response, using an interleaved one-up two down staircase approach that aimed to converge on a 71% correct performance. Independent staircases were used for each type of stimuli. The block continued until all staircases completed 9 reversals. The thresholds were computed by averaging over the last 7 reversals. The participants repeated the block two times in a row and the thresholds obtained in the two blocks were averaged. The procedure applied for adults was identical to that for children with minor exceptions. First, the initial stimulus duration in adults was set at 200 ms. Second, the initial step in adults was set at 16.7 ms and decreased to 8.3 ms after the first two reversals.

### **2.3. MEG Experiment**

#### *Experimental task*

We applied the experimental paradigm that has been shown to induce reliable MEG visual GRs in previous studies (Orekhova et al., 2015; Orekhova et al., 2019; Orekhova et al., 2018b). The



232 stimuli were generated using Presentation software (Neurobehavioral Systems Inc., The United  
233 States) and presented using a PT-D7700E-K DLP projector with 1280 x 1024 screen resolution  
234 and 60 Hz refresh rate. They consisted of black and white sinusoidally modulated annular  
235 gratings with a spatial frequency of 1.66 cycles per degree of visual angle and an outer size of 18  
236 degrees of visual angle (Fig. 2A). The gratings appeared in the center of the screen over a black  
237 background and either remained static or drifted to the central point at velocities of 1.2, 3.6, or  
238 6.0°/s, (which approximately corresponds to temporal frequencies of 0, 2, 6, and 10 Hz,  
239 respectively); hereafter, we respectively refer to these stimuli as ‘static’, ‘slow’, ‘medium,’ and  
240 ‘fast.’ In children, only the moving stimuli were presented.

241 Each trial began with a presentation of a fixation cross in the center of the display over a  
242 black background for 1200 ms that was followed by the grating that drifted for 1200-3000 ms  
243 and then stopped. The participants were instructed to respond with a button press to changes in  
244 the stimulation stream (termination of motion for moving stimuli or disappearance of the grating  
245 for static stimuli). If no response occurred within 1 s, the grating was substituted by a  
246 discouraging message ‘too late!’ that remained on the screen for 2000 ms, after which a new trial  
247 began. Stimuli were presented in three experimental blocks in a random order, resulting in 90  
248 repetitions of each stimulus type. The luminance of the screen measured at the position of the  
249 observer’s eyes was 53 Lux during the stimulation and 2.5 Lux during the inter-stimulus interval.  
250 Short (3–6 s) animated cartoon characters were presented randomly between every 2–5 stimuli  
251 to increase vigilance and minimize fatigue.

252  
253 *MEG recording*  
254 MEG was recorded at the Moscow MEG Centre (<http://megmoscow.com/>) using a 306-channel  
255 system (ElektaNeuromag Vectorview). The data was recorded with high- and low-pass filters at  
256 0.1 and 330 Hz, respectively, and digitized at 1000 Hz. The subjects' head position during MEG  
257 recording was continuously monitored.

258  
259 *MEG data preprocessing*  
260 The data was de-noised using the Temporal Signal-Space Separation (tSSS) method (Taulu and  
261 Hari, 2009), motion corrected, and adjusted to a common head position. For the following pre-  
262 processing, MNE-python software was used (Gramfort et al., 2013). The de-noised data was low-  
263 passed at 200 Hz and resampled at 500 Hz. Independent component analysis (ICA) was used to  
264 correct for biological artifacts. The data was then epoched (–1 to 1.2 s relative to the stimulus  
265 onset) and checked for the presence of residual artifacts. After rejection of the artifact-  
266 contaminated epochs and error trials, the average number of ‘good’ epochs per subject in children  
267 was 71, 72 and 71 for the ‘slow’, ‘medium,’ and ‘fast’ conditions. In adults the average number of  
268 good trials per subject over the two sessions was 80, 81, 79 and 80 for the ‘static’, ‘slow’,

269 'medium', and 'fast' conditions. More details about MEG data preprocessing are given in  
270 (Orekhova et al., 2019).  
271  
272

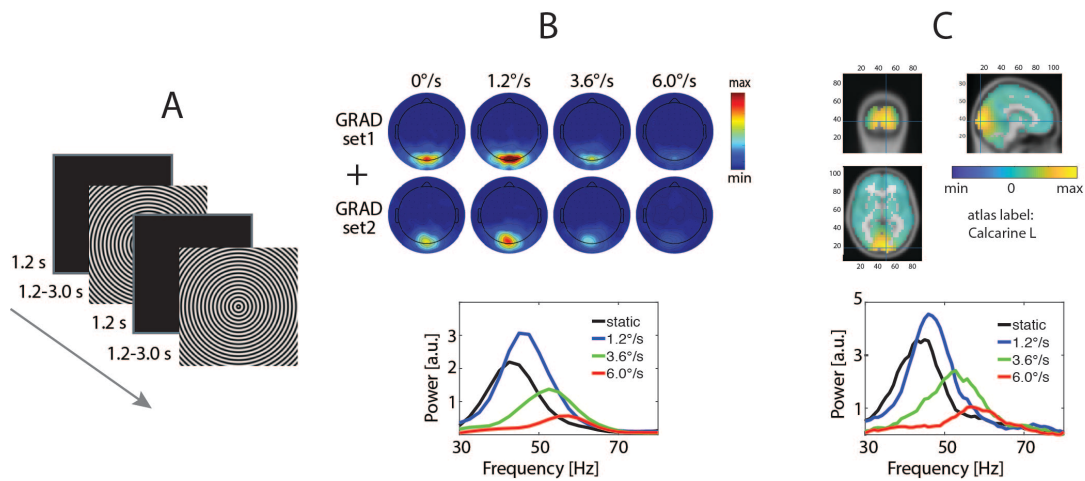

273  
274  
275 *Fig. 2 MEG experiment: stimuli and data processing. A. Experimental paradigm. The gratings*  
276 *were shown for 1.2-3 sec while they either remained static or drifted to the center of the screen*  
277 *immediately upon display at 1.2, 3.6, or 6.0 °/s. After the subject's, a fixation cross appeared in*  
278 *the center of the black screen for 1.2 sec response (see Materials and Methods for details). B. GR*  
279 *analysis in sensor space: results for a representative subject. The average change in spectral*  
280 *power (relative to baseline) was calculated from the gradiometer pair that showed the maximal*  
281 *broadband stimulus-related gamma increase. C. GR in the source space: results for a*  
282 *representative subject. LCMV beamformers were used to reconstruct the signal at 'virtual sensors'*  
283 *inside the brain. The average change in spectral power was calculated for the set of 26 connected*  
284 *vertices that included and surrounded the vertex with the maximal broadband GR (see Materials*  
285 *and Methods for details on vertex selection).*

### 286 287 MEG data analysis at the sensor level

288 Sensor-level analysis was performed using MNE-python software. To decrease the contribution of  
289 phase-locked activity (related to the appearance of the stimulus on the screen, as well as of the  
290 effect of photic driving that could be induced by the drift rate, screen refresh rate, or by their  
291 interaction), we subtracted averaged evoked responses from each single data epoch using the  
292 'subtract\_evoked' MNE function.

293 To estimate MEG signal power, we applied multitaper analysis (`tfr_multitaper`) with 3  
294 tapers (`time_bandwidth = 4`), 2.5 Hz frequency resolution, and the number of cycles equal to  
295 `frequency/2.5`. We used a fixed multitaper window of 400 ms that was centered at -800:50:-200  
296 ms time points for the pre-stimulus interval and at 400:50:1000 ms points for the post-stimulus  
297 interval. The power of the GR was then estimated as the normalized power difference between  
298 the stimulation period (`stim`) and the baseline period (`base`):  $[\text{stim-base}]/\text{base}$ .

299 To locate the ‘maximal response sensor pair’, the normalized power changes were  
300 averaged over the two gradiometers of each triplet of sensors in the gamma range (50-110 Hz in  
301 children and 35-110 Hz in adults). The location of the maximal increase of the broad-band gamma  
302 power was defined among the selected posterior positions ('MEG1932/3', 'MEG1922/3',  
303 'MEG2042/3', 'MEG2032/3', 'MEG2112/3', 'MEG2122/3', 'MEG2342/3' and 'MEG2332/3'),  
304 separately for each condition. The power response spectra were averaged over the two  
305 gradiometers and smoothed in frequency with a 3-point-averaging window. The peak gamma  
306 frequency and power were then defined at the ‘maximal pair’ of the gradiometers. A frequency  
307 range of interest was defined at those frequencies of the gamma range where the [stim-  
308 base]/base ratio exceeded 2/3 of the maximum for the particular subject and condition. The  
309 gamma peak frequency was calculated as the center of gravity, whereas the GR power was  
310 calculated as the average power over that range.

311 For each subject/condition, we calculated probabilities of a post-stimulus increase in  
312 gamma power in the stimulation period relative to the baseline using the Wilcoxon test. We  
313 considered the response reliable if the probability of the gamma power increase at its absolute  
314 maximum was significant at  $p < .0001$ .

315 In order to quantify the degree of suppression of the GR power with increasing visual  
316 motion velocity, we used the ‘gamma suppression slope’ (GSS) index introduced in our previous  
317 study (Orekhova et al., 2019). GSS is the coefficient of regression of the weighted GR power to  
318 velocity. To calculate GSS, we used the ‘fitlm’ Matlab function: `fitlm(x, y, 'y ~ x1-1')`; where  $x =$   
319  $[1.2, 3.6, 6.0]$ ,  $y = [0, \text{POW}_{\text{medium}}/\text{POW}_{\text{slow}}-1, \text{POW}_{\text{fast}}/\text{POW}_{\text{slow}}-1]$  and ‘ $y \sim x1-1$ ’ sets the  
320 intercept of the regression line to zero. The resulting regression coefficient  $b$  is equal to zero in  
321 the case of a constant response power in the three experimental conditions (i.e., ‘no suppression’)  
322 and is proportionally more negative in case of stronger velocity-related suppression of the GR.

323  
324 *MEG data analysis at the source level*  
325 The gamma activity source location was estimated with the LCMV beamformer analysis  
326 implemented in the FieldTrip M/EEG toolbox (Oostenveld et al., 2011). Prior to analysis, each  
327 subject’s brain was morphed to the MNI template brain using a nonlinear normalization and 0.6  
328 mm grid. The signal was filtered in the 30-120 Hz range and the ‘virtual sensors’ time series were  
329 extracted for each of 6855 brain voxels. The time-frequency analysis (‘mtmfft’ method,  $\pm 5$  Hz  
330 smoothing,  $\sim 1$ Hz frequency resolution) was performed for pre-stimulus (-0.8 to 0 s) and stimulus  
331 (0.4 to 1.2 s) windows for each virtual source and the results were averaged over trials. The GR  
332 parameters were then computed for its spatial maximum, which was defined as the voxel with the  
333 most significant increase in 45-90 Hz power during visual stimulation and twenty five  
334 surrounding neighboring voxels (i.e. 26 voxels). To assess the source-derived GR frequency and  
335 power, we further applied the same approach as described for the sensor space analysis.

336

### 337 *Statistical analysis*

338 To assess the test-retest reliability of MEG and psychophysical parameters, we calculated intra-  
339 class correlations using SPSS (two-way mixed model, absolute-agreement type). To estimate the  
340 effect of stimulus type, the Friedman ANOVA was used. We used Spearman correlation  
341 coefficients to quantify the correlations between variables. The data tables used for statistical  
342 analysis are available as Supplementary information to this article (Supplementary Data 1-3).

343

## 344 **3. Results**

345

### 346 **3.1. Psychophysics**

#### 347 *3.1.1. Spatial suppression effect in adults*

348 A Friedman ANOVA with factor Size (large, medium and small) revealed a highly reliable effect of  
349 grating size ( $\text{Chi-Sqr}_{(18, 2)}=30.3$ ,  $p<0.0001$ , Kendel's  $W=0.84$ ) that was due to increase of the  
350 motion direction discrimination threshold from the small to the medium and further to the large  
351 grating (Fig. 3). The effect of SS in our experimental setup was large: at the group level, we  
352 observed a more than 300% rise in the detection time as the stimulus size increased from 1 to 12°  
353 of visual angle. The median thresholds were 35 ms for the small and 117 ms for the large gratings.  
354 This was an important finding, since previous studies suggest that the SS effect may be confined  
355 to a specific range of stimulus parameters and/or certain types of displays (Troche et al., 2018).  
356 We also observed high inter-individual variability in SS: SSI values ranged from 0.05 to 1.78, i.e. a  
357 23% to 5808% increase in duration threshold. One of the participants demonstrated extremely  
358 strong SS: she needed more than one second to identify the direction of motion for the large  
359 grating.

360

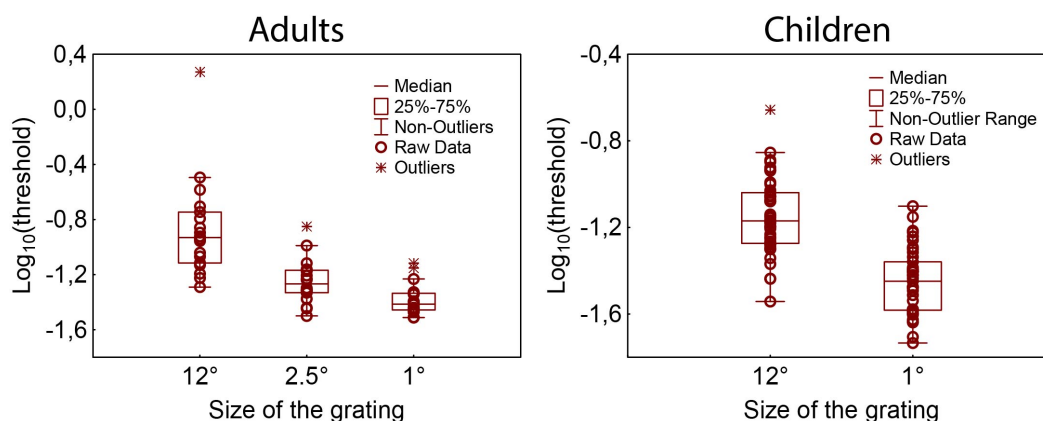

361

362

363 *Fig. 3. Log<sub>10</sub> of direction discrimination thresholds (in seconds), measured in the*  
364 *psychophysical experiment in adults and children.*

365

366 *3.1.2. Test-retest reliability of behavioral parameters in adults*

367 In adults, we assessed test-retest reliability by measuring psychophysical thresholds in two  
368 sessions, separated by 5-118 days. The intra-class correlations between the two measurements  
369 are shown in table 1. The reliability was remarkably high for motion direction discrimination  
370 thresholds for the large gratings, somewhat lower for the small gratings, (insignificant for the  
371 medium gratings), and only moderate for the SSI. For the following analysis, we averaged the  
372 psychophysical measures across the two sessions.

373  
374 Table 1. Test-retest reliability of psychophysical parameters in adults: intra-class correlations  
375 (ICC).

| Parameter                                          | ICC     |
|----------------------------------------------------|---------|
| <i>Motion direction discrimination thresholds:</i> |         |
| Large                                              | 0.95*** |
| Medium                                             | 0.43    |
| Small                                              | 0.75**  |
| SSI                                                | 0.51#   |

376 #p<0.1, \*\*p<0.01; \*\*\*p<0.001

377

378 *3.1.3. Spatial suppression effect in children*

379 Similar to adults, children needed significantly more time to discriminate the direction of motion  
380 of the large, as compared to the small, gratings (Chi-Sqr<sub>(43, 1)</sub>=35.4, p<0.0001, Kendel's W=0.82;  
381 Fig. 3), that is indicative of reliable SS. The median thresholds were 36 ms for the small and 68 ms  
382 for the large gratings that corresponded to an approximately 100% rise in thresholds as the  
383 stimulus size increased from 1 to 12° of visual angle. The individual SS values ranged from -0.093  
384 to 0.86 (-19% to 619% change in the duration threshold). Slight decreases in thresholds with  
385 increased stimulus size were observed in only 2 of 34 participants and could be explained by  
386 difficulties with reliable assessment of the psychophysical thresholds for these children.

387

388 **3.2. MEG**

389

390 *3.2.1. MEG gamma responses in adults*

391 All of the adult participants demonstrated highly statistically reliable GRs (i.e. p<0.0001, see  
392 Materials and Methods for details on estimation of inter-individual reliability) during both  
393 measurement sessions. In source space, reliable GRs were observed in all adult participants for all  
394 four types of stimuli. In the majority of individual cases, as well as at the group level (Fig. 4A), the  
395 maximal gamma increase was localized to the calcarine fissure (area V1). In this respect, our data  
396 replicates the results of previous MEG studies that implicate the primary visual cortex as a  
397 generator of gamma oscillations induced by visual gratings (Adjamian et al., 2004; Hadjipapas et

398 al., 2007; Hall et al., 2005; Hoogenboom et al., 2006; Muthukumaraswamy et al., 2010; Orekhova  
399 et al., 2019). Figures 4B and 4C show grand average time-frequency plots and spectra of the  
400 stimulus-related changes at the ‘maximal pair’ of gradiometers in adults and children.  
401  
402

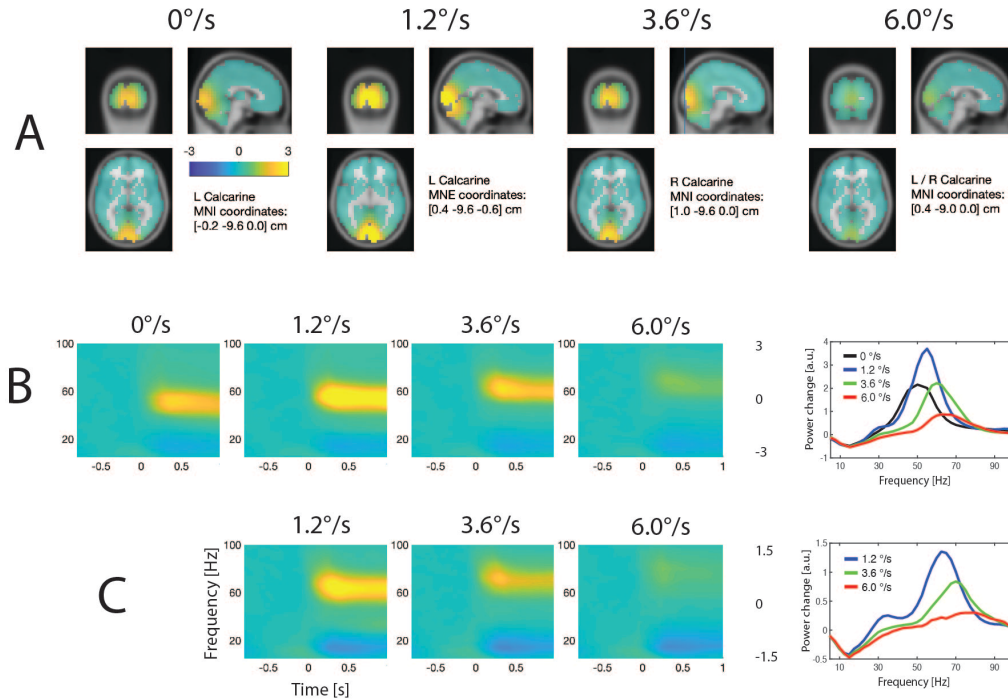

403  
404

405 *Fig. 4. Spectral MEG changes induced by annular gratings drifting at different velocities. A.*  
406 *Source localization of the group average GR power in adults. The MNI coordinates*  
407 *correspond to a voxel where the maximal GR was observed at a group level. B, C. Grand*  
408 *average time-frequency plots and the corresponding spectra of the stimulation-related*  
409 *changes in MEG power at the ‘maximal pair’ of gradiometers in adults (B) and children*  
410 *(C). Colors correspond to velocity conditions: black – ‘static’, blue – ‘slow’, green –*  
411 *‘medium’, red – ‘fast’.*  
412

413 In accordance with our previous results (Orekhova et al., 2015; Orekhova et al., 2019;  
414 Orekhova et al., 2018b), the GR frequency increased with increasing motion velocity from 0 to  
415 6°/s (in source space:  $F_{(3,51)}=97.8$ ,  $p<1e-13$ ; average frequency for static grating: 50.7 Hz, and for  
416 those drifting at different velocities - slow: 55.4 Hz, medium: 61.8 Hz, fast: 65.4 Hz). In the  
417 majority of the participants (15 of 18), the GR power increased with the transition from static to  
418 slowly moving stimuli and then decreased with increasing motion velocity (Fig. 5A), which is also  
419 consistent with our previous results (Orekhova et al., 2018b). This effect was highly reliable both  
420 in sensor ( $\text{Chi-Sqr}_{(18,3)}=40.2$ ,  $p < 0.0001$ ) and source ( $\text{Chi-Sqr}_{(18,3)}= 37.1$ ,  $p < 0.0001$ ) spaces.

421 In line with the previous reports (Muthukumaraswamy et al., 2010; Tan et al., 2016; van  
422 Pelt et al., 2012), there was considerable inter-individual variability of the GR power and

423 frequency. As an example, when measured in source space, the power of the GR elicited by slowly  
 424 moving gratings varied from subject to subject from 35% to 1040 % (relative to baseline) (Fig.  
 425 5A) and gamma frequency varied from 39 to 60 Hz.

426 We then analysed GSS – a measure of GR attenuation with increasing motion velocity for  
 427 all individuals (Fig. 5B, see Materials and Methods for details). Despite considerable inter-  
 428 individual variability, GSS was negative in all our participants, i.e. the power of the GR attenuated  
 429 with increasing motion velocity from 1.2 to 6.0°/s in all subjects (Fig. 5A).

430

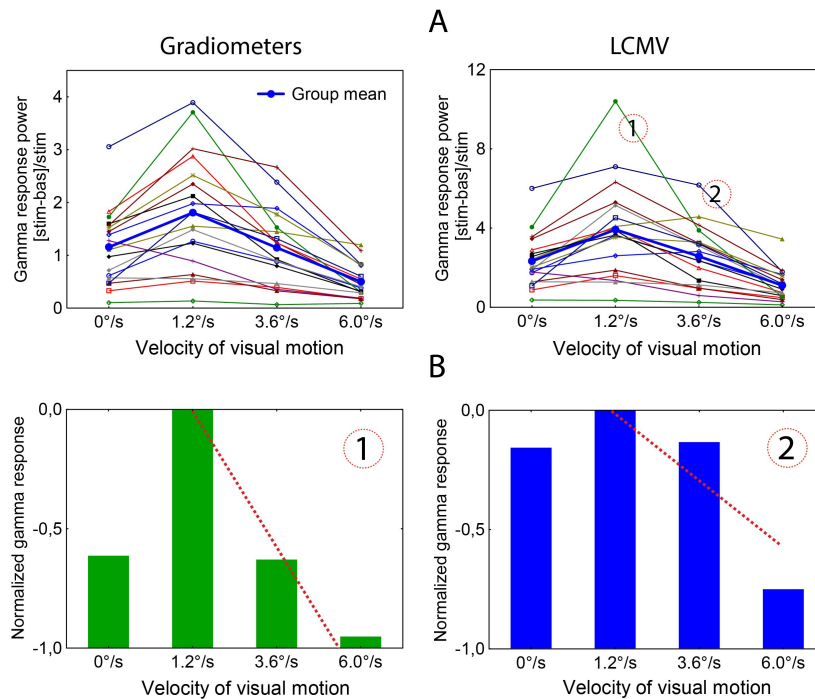

431

432

433 *Fig. 5. Dependence of GR power on the velocity of visual motion. A. Individual values of*  
 434 *the GR power in adults, assessed in the sensor and source spaces. Note that after the*  
 435 *initial increase from static to slowly moving gratings, the GR power decreases with*  
 436 *increasing velocity of visual motion. B. The gamma suppression slope (GSS) – a*  
 437 *measure that quantifies the decline in GR power as a function of visual motion velocity.*  
 438 *Subject '1' (marked '1' in A) has strong GR attenuation, while subject '2' (marked '2' in*  
 439 *A) has weaker.*

440

### 441 3.2.2. Test/re-test reliability of gamma responses in adults

442 While the frequency and amplitude of visual gamma oscillations induced by static or slowly  
 443 moving (1.6°/s) gratings are known to be highly individually stable traits (Hoogenboom et al.,  
 444 2006; Muthukumaraswamy et al., 2010), the reliability of GSS – the measure of velocity-related  
 445 attenuation of GR - has not been previously evaluated. In adults, we calculated the intra-class  
 446 correlations for the gamma parameters measured at the two sessions separated by 5-118 days  
 447 (mean=37.4 days, sd= 32.2, range 6-119; Table 2). Consistent with previous findings, MEG gamma

448 frequency and power were found to be highly reliable measures over the temporal interval  
449 studied. The reliability of GSS was also high, especially when estimated in source space.

450  
451 Table 2. Test/re-rest reliability of MEG gamma parameters in adults: intra-class correlations (ICC).

| Parameter                            | ICC              |
|--------------------------------------|------------------|
| <i>MEG / GR frequency:</i>           |                  |
| 'Static'                             | 0.88***(0.74**)  |
| 'Slow velocity'                      | 0.93***(0.97***) |
| 'Medium velocity'                    | 0.94***(0.85**)  |
| 'Fast velocity'                      | 0.81***(0.74**)  |
| <i>MEG / GR power:</i>               |                  |
| 'Static'                             | 0.94***(0.87***) |
| 'Slow velocity'                      | 0.95***(0.85***) |
| 'Medium velocity'                    | 0.88***(0.74**)  |
| 'Fast velocity'                      | 0.9***(0.72**)   |
| <i>gamma suppression slope (GSS)</i> | 0.91***(0.77**)  |

452 Note: the correlations are given for source and sensor (in parentheses) spaces; \*\*p<0.01;  
453 \*\*\*p<0.001

454  
455 3.2.3. MEG gamma responses in children

456 We have described the effects of visual motion velocity on gamma parameters in children  
457 elsewhere (Orekhova et al., 2018b). Here, these effects were reproduced in the smaller sample of  
458 participants included in the current study and were similar to those found in adults. Specifically,  
459 the GR power decreased (ANOVA Chi Sqr<sub>(34, 2)</sub> = 60, p < 0.0001), while the GR frequency increased  
460 (Chi Sqr<sub>(19, 2)</sub> = 38, p < 0.0001), with increasing velocity of visual motion from 1.2 to 6 °/s (Fig.  
461 4C). Similarly to adults, all children with reliable GRs in the 'slow' condition had negative GSS.

462  
463 **3.3. Gamma suppression slope and spatial suppression**

464 3.3.1. Adults

465 As predicted, there was a significant correlation between SS and velocity-related GR attenuation:  
466 participants with stronger GR attenuation (i.e. more negative GSS) had higher SSI (SSI vs GSS in  
467 sensor space:  $R_{(18)}=-0.51$ ,  $p<0.05$ , in source space:  $R_{(18)}=-0.71$ ,  $p<0.001$ , Fig. 6). We then looked at  
468 the correlations between GSS and the motion direction discrimination thresholds for large and  
469 small gratings. A stronger GR attenuation was associated with more time needed for a subject to  
470 discriminate the motion direction of the large grating (in sensor space:  $R_{(18)}=-0.63$ ,  $p<0.01$ ; in  
471 source space:  $R_{(18)}=-0.64$ ,  $p<0.01$ , see also Fig. 6, lower left panel). Exclusion of the outlier with an  
472 extremely high motion direction discrimination threshold for the large grating (Fig. 3, left panel)  
473 did not significantly affect the results (SSI vs GSS in sensor space:  $R_{(17)}=-0.48$ ,  $p=0.05$ ; in source  
474 space:  $R_{(17)}=-0.69$ ,  $p<0.01$ ; Threshold<sub>LARGE</sub> vs GSS in sensor space:  $R_{(17)}=-0.61$ ,  $p<0.01$ ; in source  
475 space:  $R_{(17)}=-0.61$ ,  $p<0.01$ ). Concurrently, the thresholds for the small or medium gratings did not  
476 correlate with GSS (GSS in sensor space vs Threshold<sub>SMALL</sub>:  $R_{(18)}=-0.13$  vs Threshold<sub>MEDIUM</sub>:  $R_{(18)}=-$   
477 0.34; GSS in source space vs Threshold<sub>SMALL</sub>:  $R_{(18)}=0.014$ , Threshold<sub>MEDIUM</sub>:  $R_{(18)}=-0.06$ ). Thus, GSS



478 magnitude appears to be selectively related to a subject's capacity to detect the motion direction  
 479 of the large gratings.

480 To examine whether SSI is specifically linked to GSS, we correlated this psychophysical  
 481 index with other parameters of the GR. Neither gamma peak frequency nor gamma peak power  
 482 predicted SSI; neither of them predicted the motion direction discrimination threshold for the  
 483 large grating, either (Spearman  $R$ 's: all  $p$ 's > 0.1 for all velocities in both sensor and source spaces).  
 484 In particular, absence of significant correlations between SSI and GR magnitudes indicates that  
 485 the correlation between SSI and GSS was not driven by GR magnitude under any specific velocity  
 486 condition.

487

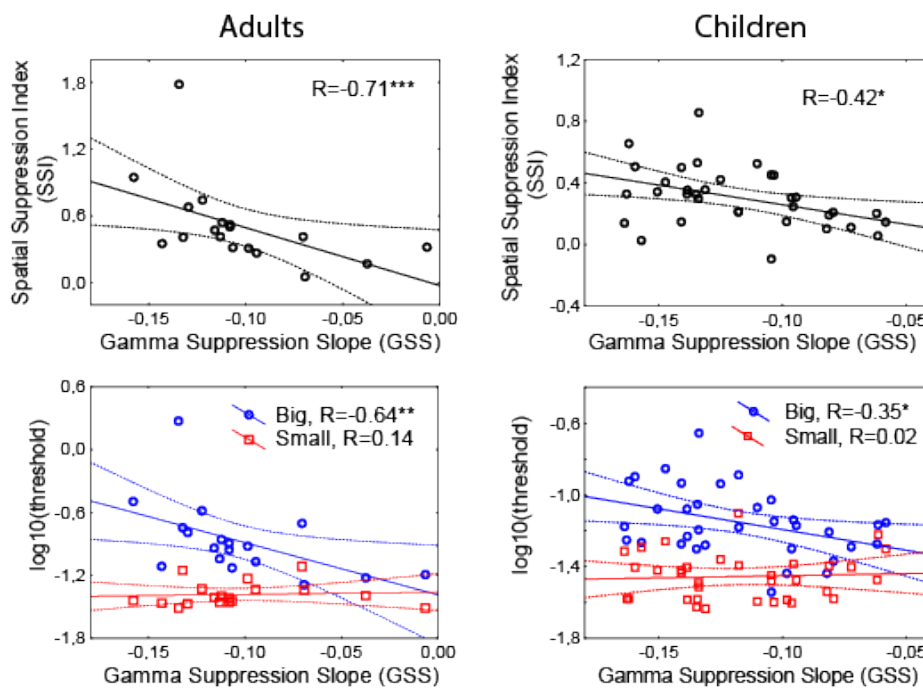

488

489

490 *Fig. 6. The relationship between GR suppression and SS in adults and children. **Upper***  
 491 ***row:** relationship between GSS and SSI. **Lower row:** the relationship between GSS and*  
 492 *duration thresholds. Note that no reliable correlations were found between GSS and*  
 493 *duration thresholds for the small stimuli. GSS is shown for the brain sources in adults*  
 494 *and for the pairs of MEG sensors in children. Solid lines denote the regression; dashed*  
 495 *lines mark 95% confidence intervals.  $R$ 's are the Spearman correlation coefficients.*  
 496 *\* $p$ <0.05, \*\* $p$ <0.01, \*\*\* $p$ <0.001.*

497

### 498 3.3.2. Test/re-test reliability of neurobehavioral correlations in adults

499 To ensure that the relationship between GSS and psychophysical parameters was reproducible  
 500 across time, we calculated the neuro-behavioral correlations for the measurements obtained at  
 501 the 1<sup>st</sup> and the 2<sup>nd</sup> visits. There was good agreement in these correlations between the visits (In  
 502 source space: 1<sup>st</sup> visit GSS vs SSI:  $R_{(18)}=-0.58$ ,  $p<0.05$ , GSS vs Threshold<sub>BIG</sub>:  $R_{(18)}=-0.57$ ,  $p<0.05$ ; 2<sup>nd</sup>  
 503 visit GSS vs SSI:  $R_{(18)}=-0.53$ ,  $p<0.05$ , GSS vs Threshold<sub>BIG</sub>:  $R_{(18)}=-0.60$ ,  $p<0.01$ ).

504  
505 **3.3.3. Children**  
506 Similarly to adults, stronger SS was associated with more negative GSS measured in the sensor  
507 space ( $R_{(34)}=-0.42$ ,  $p<0.05$ ; Fig. 6). In other words, those children who had stronger SS also  
508 demonstrated stronger velocity-related GR attenuation. Also, in striking similarity to adults,  
509 correlation with GSS in children was driven by the thresholds for the large gratings ( $R_{(34)}=-0.35$ ,  
510  $p<0.05$ ; Fig. 6), while no reliable correlation was found for the small grating ( $R_{(34)}=0.02$ ).

511 Overall, the observed relationship between velocity-related GR attenuation and SS  
512 matches the hypothesis of their common inhibitory basis and suggest its generality across the  
513 genders and ages studied.

514  
515 **3.4. Gamma suppression slope, spatial suppression and IQ**

516 Previous studies have suggested that stronger inhibitory control in the visual cortex favors  
517 efficient cognitive functioning (Cook et al., 2016; Melnick et al., 2013). Therefore, the strength of  
518 inhibition measured through GSS may affect not only SS, but also contribute to higher cognitive  
519 functions. Indeed, we found that children with more negative GSS had higher IQ (KABC-II, Mental  
520 Processing Index (MPI):  $R_{(34)}=0.41$ ,  $p<0.05$  (Fig. 7). At the same time, SS strength did not correlate  
521 with IQ ( $R_{(34)}=-0.04$ ). Information about IQ was not available for the adult participants;  
522 generalization of these findings to adults is thus not possible.

523  
524

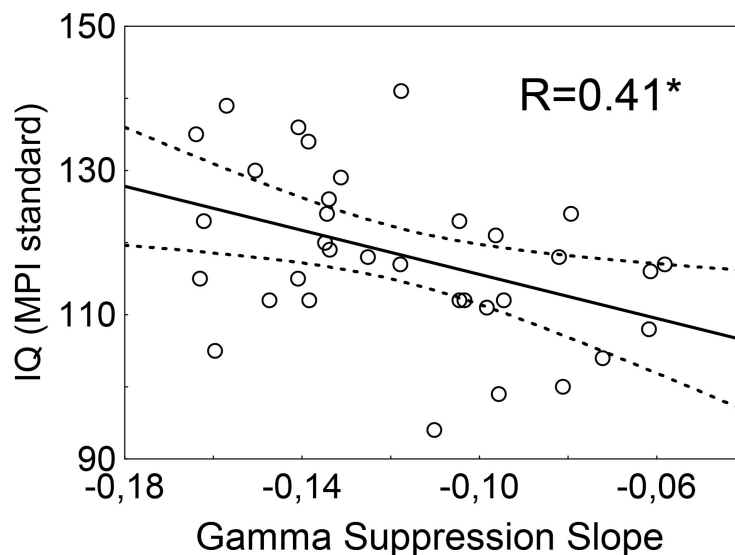

525  
526  
527 *Fig. 7. The relationship between GSS and IQ in children. Solid lines denote the*  
528 *regression; dashed lines mark 95% confidence intervals. R is the Spearman correlation*  
529 *coefficient; \* $p<0.05$*

530  
531

## 532 **4. Discussion**

533  
534 Using a behavioral task and magnetoencephalography, we tested for a link between two  
535 phenomena, both of which have been suggested to depend on efficacy of inhibitory control in the  
536 visual cortex. The first one – SS in visual motion perception - refers to the reduction of directional  
537 sensitivity to large, as compared to small, rapidly moving high-contrast visual gratings. The  
538 second one – GSS – is a progressive attenuation of MEG GR with increasing velocity of the large  
539 high-contrast visual gratings. We found that a stronger GR attenuation predicted stronger SS, i.e.  
540 greater deterioration of behavioral performance with increasing size of the grating. This neuro-  
541 behavioral correlation was replicated in two independent samples of participants – adult women  
542 and boys aged 7-15 years. Neither GR peak frequency nor its peak power measured in a single  
543 experimental condition predicted SS in any group of subjects. Our findings therefore highlight the  
544 functional relevance of velocity-related *changes* in GR power caused by augmentation of incoming  
545 input. In the following discussion, we consider a possible neural basis for the observed neuro-  
546 behavioral correlation.

547

### 548 **4.1. SS, MEG gamma oscillations, and surround suppression in the visual cortex**

549 The presence of a reliable SS is a necessary prerequisite for finding its correlation with MEG  
550 gamma-based measures. The SS effect assessed in a separate psychophysical experiment in our  
551 study was reliable in both adults and children: the participants needed significantly longer  
552 presentation times in order to discriminate motion direction of the large, as compared to small,  
553 visual gratings (Fig. 2). Moreover, our assessment of the test-retest reliability of direction  
554 discrimination thresholds performed in adults has shown that it was high (Table 1).

555 In accordance with our previously published results (Orekhova et al., 2015; Orekhova et  
556 al., 2018a), large high-contrast visual gratings, when presented at the ‘optimal’ velocity of 1.2°/s,  
557 induced strong GRs in all adult participants and in the majority of children. Also in accordance  
558 with previous studies (Adjamian et al., 2004; Hadjipapas et al., 2007; Hall et al., 2005;  
559 Hoogenboom et al., 2006; Muthukumaraswamy et al., 2010; Orekhova et al., 2015; Orekhova et al.,  
560 2018a), the maximum of the visual GR was located in V1. The combination of regular orientation,  
561 high contrast, large size, and slow motion velocity of the grating facilitated high amplitude gamma  
562 oscillations. Indeed, each of these visual features enhances GRs in the primary visual cortex in  
563 humans and animals (Gieselmann and Thiele, 2008; Hadjipapas et al., 2015; Hermes et al., 2015;  
564 Jia et al., 2011; Jia et al., 2013; Lima et al., 2010; Orekhova et al., 2015; Orekhova et al., 2018a;  
565 Perry, 2015; Perry et al., 2013; Perry et al., 2015; Ray and Maunsell, 2015; van Pelt and Fries,  
566 2013).

567 The crucial factor affecting visual gamma oscillations seems to be the size of the visual  
568 stimulus --- gamma is generated only when the stimulus is large enough to engage both the center

569 and the inhibitory surround of the neurons' receptive fields (Gieselmann and Thiele, 2008;  
570 Shushruth et al., 2012). Gieselmann and Thiele (Gieselmann and Thiele, 2008) have shown that  
571 local field potential (LFP) gamma-band activity increased monotonically with grating size, despite  
572 a concomitant drop in neuronal spiking rates. The increase in LFP gamma power was maximal for  
573 stimuli overlapping the near classical receptive field surround, where suppression started to  
574 dominate spiking activity (Gieselmann and Thiele, 2008).

575         The large annular gratings used in our MEG experiment (18° of visual angle) should have  
576 led to the strong involvement of the inhibitory surround in the populational neural activity at the  
577 V1 level. Therefore, the changes in GR elicited by increasing the gratings' drift rate can be a direct  
578 consequence of surround modulation effects in V1. A nearly linear growth of GR frequency with  
579 increasing visual motion velocity from 0 up to 6°/s in our study most likely reflects a growing of  
580 intensity in the excitatory drive and related growth of excitability of excitatory, and especially  
581 inhibitory neurons; the later being largely responsible for changes in frequency of gamma  
582 oscillations (Anver et al., 2011; Mann and Mody, 2010). The same factor may account for the  
583 inverted parabolic trajectory of the GR power (Fig. 5; see (Orekhova et al., 2019) for discussion).  
584 In particular, the reduction of the GR with increasing motion velocity beyond the 'optimal' value  
585 of ~1.2°/s is likely to be driven by an excessively strong involvement of the inhibitory surround  
586 in the populational neural activity at the V1 level. In our present study, the suppression of the  
587 visual GR at motion velocity above 1.2-3.6°/s has been observed in every subject, irrespectively of  
588 his/her age or gender, suggesting that the velocity-related gamma attenuation reflects this basic  
589 inhibitory-based mechanism of cortical function.

590         MEG is capable of detecting gamma oscillations only if the coherent activity in the gamma  
591 range is observed in a large portion of the visual cortex. Therefore, the presence of prominent GRs  
592 in our MEG study suggests widespread in-phase gamma synchronization in the visual cortex.  
593 Indeed, animal studies have revealed phase-alignment of LFP gamma oscillations over a broad V1  
594 area (Eckhorn et al., 1988; Jia et al., 2011). One plausible mechanism of such distributed gamma  
595 synchronization is feedback connections from the higher-tier visual areas, which extend over long  
596 distances and play a pivotal role in surround suppression (Angelucci et al., 2017; Angelucci and  
597 Bressloff, 2006; Nurminen et al., 2018) as well as its perceptual consequence i.e., SS (Liu et al.,  
598 2016; Tadin, 2015; Tadin et al., 2003). Being strongly engaged by spatially extended fast moving  
599 stimuli, the higher-tier visual areas, including MT, may affect both SS and GR through potentiating  
600 surround suppression in V1.

601         The role of surround inhibition in both SS and GR power is supported by the key finding of  
602 the current study replicated in the two independent samples of subjects of different age and  
603 gender (Fig. 6): the psychophysically measured SSI significantly correlates with the GSS index  
604 (the latter of which quantifies the attenuation of GR in V1 at high velocities of visual motion). As  
605 predicted, in both samples of subjects, GSS also correlated with duration thresholds for the *large*

606 moving grating that causes surround inhibition, but not with the same for the small grating that  
607 does not. This selectivity strongly implicates surround inhibition in the observed neuro-  
608 behavioral correlation.

609 The hypothesis that intensive visual input (e.g. gratings that are large in size, high in  
610 contrast, and moving with high velocity) is a factor that mediates GSS-SSI correlation through a  
611 disproportionate increase in surround inhibition is compatible with theoretical models of  
612 surround inhibition (Rubin et al., 2015). Recent neurophysiological evidence furthermore directly  
613 verifies these models (Adesnik, 2017). Adesnik and colleagues performed intracellular voltage-  
614 clamp measurements of excitatory and inhibitory post-synaptic currents in the primary visual  
615 cortex of awake mice and found that increasing the size and/or contrast of a visual grating leads  
616 to a gradual increase in excitatory current paralleled by more steep increase of inhibitory current;  
617 the result is thus a decline in the E/I ratio.

618 Our findings, as well as the results of animal studies, seem to conflict with the ‘withdrawal  
619 of excitation’ explanation for SS put forth by Schallmo et al (Schallmo et al., 2018). Those authors  
620 concluded that surround suppression in both V1 and the higher-tier visual area MT is primarily  
621 driven by a decrease in excitation, which is balanced by reduced inhibition in visual networks  
622 (Schallmo et al., 2018). A lack of significant correlations between GABA concentration at rest and  
623 either psychophysically measured SS or the size-dependent decrease in BOLD signal in MT and V1  
624 regions supports this explanation. However, inter-individual differences in neural inhibition may  
625 depend on complex interactions between numerous pre-synaptic, post-synaptic, and extra-  
626 synaptic mechanisms (Isaacson and Scanziani, 2011) and might not be reflected in MRS  
627 measurements of GABA (Goncalves et al., 2017). The ‘withdrawal of excitation’ hypothesis  
628 furthermore fails to provide meaningful explanation for the velocity dependence of the GR  
629 frequency in the face of experimental results. Large gratings moving at velocities greater than  
630 1°/s produce stronger spatial suppression than those moving at slower velocities (Lappin et al.,  
631 2009). Faster velocities within the 0°/s – 6 °/s range furthermore produce a substantial increase  
632 in visual GR frequency (Fig. 4; see also van Pelt et al, 2018 ). Such an increase indicates excitation  
633 is *elevated* in inhibitory neurons in human V1 because the GR frequency directly depends on the  
634 excitatory state of inhibitory neurons (Anver et al., 2011; Mann and Mody, 2010). However, if SS  
635 is driven by ‘withdrawal of excitation’, then faster motion velocities should presumably lead to  
636 *reduced* excitation of both excitatory and inhibitory neurons in V1. Because such a reduction in  
637 excitation should be accompanied by a decrease in gamma response frequency, this presumption  
638 is contrary to the evidence. On the other hand, the strong size-dependent reduction in the V1  
639 BOLD signal, paralleled by a less pronounced reduction in MT+, reported by Schallmo et al  
640 (Schallmo et al., 2018) does not contradict the model suggested by Angelucci (Angelucci et al.,  
641 2017; Angelucci and Bressloff, 2006), which posits that SS is a direct consequence of center-  
642 surround antagonism within V1, while MT enhances this antagonism by potentiating inhibition in

643 V1 through providing excitatory feedback to V1.

644

#### 645 **4.2. Replication of the results and test-retest reliability**

646 An important advantage of our study is the testing for replication of the anticipated neuro-  
647 behavioral correlations in two diverse groups of participants, as well as estimation of test-retest  
648 reliability of these correlations and the neurophysiological and psychophysical parameters  
649 themselves.

650 First, the correlation between GSS and SS was replicated in the two groups of subjects i.e.,  
651 GSS correlates with SS in both adult women and male children (Fig. 6). This suggests the results  
652 are robust with respect to sampling bias and can be generalized across gender and ages studied.

653 Second, the MEG gamma characteristics and psychophysical thresholds were replicated in  
654 the two temporally-separated measurement sessions i.e., we report a high test-retest reliability of  
655 these parameters in sessions that were separated by several days or weeks. The high test-retest  
656 reliability of GSS is, at first glance, similar to that of the GR power and frequency evaluated  
657 separately in each velocity condition (Table 2; see also (Hoogenboom et al., 2006;  
658 Muthukumaraswamy et al., 2010). However, constitutional factors including cortical morphology  
659 (Butler et al., 2019) and degree of muscle tension (Muthukumaraswamy, 2013; Whithain et al.,  
660 2007; Whitham et al., 2008) can specifically affect MEG/EEG gamma power while gamma  
661 frequency may be affected by the size of the V1 area (Schwarzkopf et al., 2012; van Pelt et al.,  
662 2018). These features, that are not directly related to the functioning of neural networks,  
663 contribute to the estimated intra-individual stability of gamma frequency and amplitude  
664 measured under a single experimental condition. However, and in contrast to gamma power and  
665 frequency, GSS is a relational measure that relies upon between-stimulus differences in response  
666 strength, which are not (or less) affected by brain morphology and SNR. Therefore, individual  
667 differences in GSS are likely to be trait-like and mainly of neurophysiological origin.

668

#### 669 **4.3. SS, MEG gamma oscillations, and IQ in children**

670 A collateral, but remarkable finding is the significant correlation between GSS and psychometric  
671 intelligence in children, for whom IQ information was available. Notably, there were no  
672 correlations between IQ and either SSI or motion direction discrimination thresholds. If  
673 individual variations in both GSS and SSI reflect variability in neural mechanisms that are  
674 responsible for surround suppression, why would IQ correlate with only one of these measures,  
675 namely GSS? Of note, there are previous reports of strong (Melnick et al., 2013) or moderate  
676 (Arranz-Paraiso and Serrano-Pedraza, 2018) SSI-IQ correlations in adults. However, the recent  
677 large (177 participants) and methodologically advanced study by Troche et al failed to replicate  
678 this SSI-IQ association (Troche et al., 2018). One of the reasons for these divergent results might  
679 be the fact that participants with higher intelligence were faster to detect motion direction for all

680 (large and small) stimuli (Troche et al., 2018). This dependency of IQ on processing speed may  
681 obscure the IQ-SSI correlation, which, when found, showed that duration thresholds of motion  
682 direction discrimination for large and small stimuli correlate with IQ in opposite directions  
683 (Melnick et al., 2013). Specifically, higher IQ was associated with higher duration thresholds for  
684 large, but lower duration thresholds for the small stimuli (Melnick et al., 2013).

685 Thus, beyond individual differences in surround suppression, SSI depends on other  
686 psychological variables that might affect the results of the psychophysical experiment.  
687 Neurophysiological variables, such as GSS, are less likely to depend on processing speed, and may  
688 thus reflect inter-individual differences in surround suppression better than psychophysical  
689 measures do. If GSS indeed reflects inhibition efficiency, its correlation with IQ is well in line with  
690 the role of 'inhibition-stabilized networks' in cortical computations (Rubin et al., 2015). Moreover,  
691 the efficiency of recurrent feedback to V1 from higher-tier visual areas (Angelucci et al., 2017;  
692 Angelucci and Bressloff, 2006; Nurminen et al., 2018) may reflect general efficacy of top-down  
693 modulations important for cognitive control and contributing to the link between IQ and neural  
694 gamma dynamics in the primary visual cortex.

695  
696 *To summarize*, our study provides the first evidence that links the psychophysical phenomenon of  
697 spatial suppression and the inhibitory-based neural gamma responses in the human primary  
698 visual cortex. The results are replicated in two groups of subjects - adult women and male  
699 children, which suggests they are robust and general across age and gender. Our findings support  
700 the role of inhibitory interactions in the V1 as the mechanism of spatial suppression.

701

702

### 703 **Acknowledgements**

704 This work has been supported by the research grant from The Moscow State University of  
705 Psychology and Education (MSUPE), The Knut and Alice Wallenberg foundation (KAW2014.0102)  
706 and The Swedish Childhood Cancer Foundation (MT2018-0020).

707

### 708 **Conflict of interests**

709 Authors report no conflicts of interests.

710

### 711 **References**

- 712 Adesnik, H., 2017. Synaptic Mechanisms of Feature Coding in the Visual Cortex of Awake Mice.  
713 Neuron 95, 1147-1159.
- 714 Adjamian, P., Holliday, I.E., Barnes, G.R., Hillebrand, A., Hadjipapas, A., Singh, K.D., 2004. Induced  
715 visual illusions and gamma oscillations in human primary visual cortex. Eur J Neurosci 20,  
716 587-592.
- 717 Angelucci, A., Bijanzadeh, M., Nurminen, L., Federer, F., Merlin, S., Bressloff, P.C., 2017. Circuits and  
718 Mechanisms for Surround Modulation in Visual Cortex. Annual Review of Neuroscience, Vol  
719 40 40, 425-451.

- 720 Angelucci, A., Bressloff, P.C., 2006. Contribution of feedforward, lateral and feedback connections  
721 to the classical receptive field center and extra-classical receptive field surround of primate  
722 V1 neurons. *Prog Brain Res* 154, 93-120.
- 723 Anver, H., Ward, P.D., Magony, A., Vreugdenhil, M., 2011. NMDA Receptor Hypofunction Phase  
724 Couples Independent gamma-Oscillations in the Rat Visual Cortex.  
725 *Neuropsychopharmacology* 36, 519-528.
- 726 Arranz-Paraiso, S., Serrano-Pedraza, I., 2018. Testing the link between visual suppression and  
727 intelligence. *Plos One*.
- 728 Atallah, B.V., Bruns, W., Carandini, M., Scanziani, M., 2012. Parvalbumin-Expressing Interneurons  
729 Linearly Transform Cortical Responses to Visual Stimuli. *Neuron* 73, 159-170.
- 730 Baddeley, R., Abbott, L.F., Booth, M.C.A., Sengpiel, F., Freeman, T., Wakeman, E.A., Rolls, E.T., 1997.  
731 Responses of neurons in primary and inferior temporal visual cortices to natural scenes.  
732 *Proceedings of the Royal Society B-Biological Sciences* 264, 1775-1783.
- 733 Barlow, H.B., 1961. The coding of sensory messages. In: Thorpe, W.H., Zangwill, L. (Eds.), *Current*  
734 *Problems in Animal Behavior*. Cambridge U. Press, Cambridge, pp. 331-360.
- 735 Betts, L.R., Sekuler, A.B., Bennett, P.J., 2007. The effects of aging on orientation discrimination.  
736 *Vision Research* 47, 1769-1780.
- 737 Betts, L.R., Sekuler, A.B., Bennett, P.J., 2012. Spatial characteristics of motion-sensitive  
738 mechanisms change with age and stimulus spatial frequency. *Vision Research* 53, 1-14.
- 739 Borgers, C., Kopell, N., 2005. Effects of noisy drive on rhythms in networks of excitatory and  
740 inhibitory neurons. *Neural Computation* 17, 557-608.
- 741 Born, R.T., Bradley, D.C., 2005. Structure and function of visual area MT. *Annual Review of*  
742 *Neuroscience*, Vol 40 28, 157-189.
- 743 Brainard, D.H., 1997. The psychophysics toolbox. *Spat. Vis.* 10, 433-436.
- 744 Butler, R., Bernier, P.M., Mierzwinski, G.W., Descoteaux, M., Gilbert, G., Whittingstall, K., 2019.  
745 Cortical distance, not cancellation, dominates inter-subject EEG gamma rhythm amplitude.  
746 *Neuroimage* 192, 156-165.
- 747 Button, K.S., Ioannidis, J.P.A., Mokrysz, C., Nosek, B.A., Flint, J., Robinson, E.S.J., Munafò, M.R., 2013.  
748 Power failure: why small sample size undermines the reliability of neuroscience. *Nat Rev*  
749 *Neurosci* 14, 365-376.
- 750 Buzsáki, G., Anastassiou, C.A., Koch, C., 2012. The origin of extracellular fields and currents - EEG,  
751 ECoG, LFP and spikes. *Nat Rev Neurosci* 13, 407-420.
- 752 Buzsáki, G., Wang, X.J., 2012. Mechanisms of Gamma Oscillations. *Annual Review of Neuroscience*,  
753 Vol 40 35, 203-225.
- 754 Cannon, J., McCarthy, M.M., Lee, S., Lee, J., Borgers, C., Whittington, M.A., Kopell, N., 2014.  
755 Neurosystems: brain rhythms and cognitive processing. *Eur J Neurosci* 39, 705-719.
- 756 Cardin, J.A., Carlen, M., Meletis, K., Knoblich, U., Zhang, F., Deisseroth, K., Tsai, L.H., Moore, C.I.,  
757 2009. Driving fast-spiking cells induces gamma rhythm and controls sensory responses.  
758 *Nature* 459, 663-U663.
- 759 Cook, E., Hammett, S.T., Larsson, J., 2016. GABA predicts visual intelligence. *Neurosci Lett* 632,  
760 50-54.
- 761 Desimone, R., Duncan, J., 1995. Neural mechanisms of selective visual attention. *Annual Review of*  
762 *Neuroscience*, Vol 40 18, 193-222.
- 763 Eckhorn, R., Bauer, R., Jordan, W., Brosch, M., Kruse, W., Munk, M., Reitboeck, H.J., 1988. Coherent  
764 Oscillations - a Mechanism of Feature Linking in the Visual-Cortex - Multiple Electrode and  
765 Correlation Analyses in the Cat. *Biological Cybernetics* 60, 121-130.
- 766 Field, D.J., 1987. Relations between the Statistics of Natural Images and the Response Properties  
767 of Cortical-Cells. *Journal of the Optical Society of America a-Optics Image Science and Vision*  
768 4, 2379-2394.
- 769 Foss-Feig, J.H., Tadin, D., Schauder, K.B., Cascio, C.J., 2013. A Substantial and Unexpected  
770 Enhancement of Motion Perception in Autism. *J Neurosci* 33, 8243-8249.
- 771 Gieselmann, M.A., Thiele, A., 2008. Comparison of spatial integration and surround suppression  
772 characteristics in spiking activity and the local field potential in macaque V1. *Eur J Neurosci*  
773 28, 447-459.



- 774 Golomb, J.D., McDavitt, J.R.B., Ruf, B.M., Chen, J.I., Saricicek, A., Maloney, K.H., Hu, J., Chun, M.M.,  
775 Bhagwagar, Z., 2009. Enhanced Visual Motion Perception in Major Depressive Disorder. *J*  
776 *Neurosci* 29, 9072-9077.
- 777 Goncalves, J., Violante, I.R., Sereno, J., Leitao, R.A., Cai, Y., Abrunhosa, A., Silva, A.P., Silva, A.J.,  
778 Castelo-Branco, M., 2017. Testing the excitation/inhibition imbalance hypothesis in a mouse  
779 model of the autism spectrum disorder: in vivo neurospectroscopy and molecular evidence  
780 for regional phenotypes. *Mol Autism* 8, 47.
- 781 Gramfort, A., Luessi, M., Larson, E., Engemann, D.A., Strohmeier, D., Brodbeck, C., Goj, R., Jas, M.,  
782 Brooks, T., Parkkonen, L., Hamalainen, M., 2013. MEG and EEG data analysis with MNE-  
783 Python. *Front Neurosci*.
- 784 Hadjipapas, A., Adjamian, P., Swettenham, J.B., Holliday, I.E., Barnes, G.R., 2007. Stimuli of varying  
785 spatial scale induce gamma activity with distinct temporal characteristics in human visual  
786 cortex. *Neuroimage* 35, 518-530.
- 787 Hadjipapas, A., Lowet, E., Roberts, M.J., Peter, A., De Weerd, P., 2015. Parametric variation of  
788 gamma frequency and power with luminance contrast: A comparative study of human MEG  
789 and monkey LFP and spike responses. *Neuroimage* 112, 327-340.
- 790 Hall, S.D., Holliday, I.E., Hillebrand, A., Singh, K.D., Furlong, P.L., Hadjipapas, A., Barnes, G.R., 2005.  
791 The missing link: analogous human and primate cortical gamma oscillations. *Neuroimage* 26,  
792 13-17.
- 793 Hasenstaub, A., Shu, Y.S., Haider, B., Kraushaar, U., Duque, A., McCormick, D.A., 2005. Inhibitory  
794 postsynaptic potentials carry synchronized frequency information in active cortical networks.  
795 *Neuron* 47, 423-435.
- 796 Hermes, D., Miller, K.J., Wandell, B.A., Winawer, J., 2015. Stimulus Dependence of Gamma  
797 Oscillations in Human Visual Cortex. *Cerebral Cortex* 25, 2951-2959.
- 798 Hoogenboom, N., Schoffelen, J.M., Oostenveld, R., Parkes, L.M., Fries, P., 2006. Localizing human  
799 visual gamma-band activity in frequency, time and space. *Neuroimage* 29, 764-773.
- 800 Isaacson, J.S., Scanziani, M., 2011. How Inhibition Shapes Cortical Activity. *Neuron* 72, 231-243.
- 801 Jia, X.X., Smith, M.A., Kohn, A., 2011. Stimulus Selectivity and Spatial Coherence of Gamma  
802 Components of the Local Field Potential. *J Neurosci* 31, 9390-9403.
- 803 Jia, X.X., Xing, D.J., Kohn, A., 2013. No Consistent Relationship between Gamma Power and Peak  
804 Frequency in Macaque Primary Visual Cortex. *J Neurosci* 33, 17-U421.
- 805 Kaufman, A.S., Kaufman, N.L., 2004. KABC-II : Kaufman Assessment Battery for Children, 2nd ed., 2  
806 ed. AGS Pub, Circle Pines, MN.
- 807 King, P.D., Zylberberg, J., DeWeese, M.R., 2013. Inhibitory interneurons decorrelate excitatory  
808 cells to drive sparse code formation in a spiking model of V1. *J Neurosci* 33, 5475-5485.
- 809 Kopell, N., Börgers, C., Pervouchine, D., Malerba, P., Tort, A., 2010. Gamma and Theta Rhythms in  
810 Biophysical Models of Hippocampal Circuits. *Springer Series in Computational Neuroscience*  
811 Springer Science+Business Media.
- 812 Lappin, J.S., Tadin, D., Nyquist, J.B., Corn, A.L., 2009. Spatial and temporal limits of motion  
813 perception across variations in speed, eccentricity, and low vision. *Journal of Vision*.
- 814 Lima, B., Singer, W., Chen, N.H., Neuenschwander, S., 2010. Synchronization Dynamics in Response  
815 to Plaid Stimuli in Monkey V1. *Cerebral Cortex* 20, 1556-1573.
- 816 Liu, L.D., Haefner, R.M., Pack, C.C., 2016. A neural basis for the spatial suppression of visual motion  
817 perception. *Elife*.
- 818 Mann, E.O., Mody, I., 2010. Control of hippocampal gamma oscillation frequency by tonic  
819 inhibition and excitation of interneurons. *Nature Neuroscience* 13, 205-U290.
- 820 Melnick, M.D., Harrison, B.R., Park, S., Bennetto, L., Tadin, D., 2013. A strong interactive link  
821 between sensory discriminations and intelligence. *Curr Biol* 23, 1013-1017.
- 822 Muthukumaraswamy, S.D., 2013. High-frequency brain activity and muscle artifacts in MEG/EEG:  
823 a review and recommendations. *Frontiers in Human Neuroscience*.
- 824 Muthukumaraswamy, S.D., Singh, K.D., Swettenham, J.B., Jones, D.K., 2010. Visual gamma  
825 oscillations and evoked responses: Variability, repeatability and structural MRI correlates.  
826 *Neuroimage* 49, 3349-3357.
- 827 Nurminen, L., Angelucci, A., 2014. Multiple components of surround modulation in primary visual  
828 cortex: multiple neural circuits with multiple functions? *Vision Research* 104, 47-56.

- 829 Nurminen, L., Merlin, S., Bijanzadeh, M., Federer, F., Angelucci, A., 2018. Top-down feedback  
830 controls spatial summation and response amplitude in primate visual cortex. *Nature*  
831 *Communications*.
- 832 Olshausen, B.A., Field, D.J., 2004. Sparse coding of sensory inputs. *Current Opinion in*  
833 *Neurobiology* 14, 481-487.
- 834 Oostenveld, R., Fries, P., Maris, E., Schoffelen, J.M., 2011. FieldTrip: Open source software for  
835 advanced analysis of MEG, EEG, and invasive electrophysiological data. *Comput Intell*  
836 *Neurosci*.
- 837 Orekhova, E.V., Butorina, A.V., Sysoeva, O.V., Prokofyev, A.O., Nikolaeva, A.Y., Stroganova, T.A.,  
838 2015. Frequency of gamma oscillations in humans is modulated by velocity of visual motion.  
839 *Journal of Neurophysiology* 114, 244-255.
- 840 Orekhova, E.V., Prokofyev, A.O., Nikolaeva, A.Y., Schneiderman, J.F., Stroganova, T.A., 2018a.  
841 Additive effect of contrast and velocity proves the role of strong excitatory drive in  
842 suppression of visual gamma response. *BioRxiv*.
- 843 Orekhova, E.V., Stroganova, T.A., Schneiderman, J.F., Lundstrom, S., Riaz, B., Sarovic, D., Sysoeva,  
844 O.V., Brant, G., Gillberg, C., Hadjikhani, N., 2019. Neural gain control measured through  
845 cortical gamma oscillations is associated with sensory sensitivity. *Hum Brain Mapp* 40,  
846 1583-1593.
- 847 Orekhova, E.V., Sysoeva, O.V., Schneiderman, J.F., Lundstrom, S., Galuta, I.A., Goiaeva, D.E.,  
848 Prokofyev, A.O., Riaz, B., Keeler, C., Hadjikhani, N., Gillberg, C., Stroganova, T.A., 2018b. Input-  
849 dependent modulation of MEG gamma oscillations reflects gain control in the visual cortex.  
850 *Sci Rep* 8, 8451.
- 851 Perry, G., 2015. The effects of cross-orientation masking on the visual gamma response in humans.  
852 *Eur J Neurosci* 41, 1484-1495.
- 853 Perry, G., Hamandi, K., Brindley, L.M., Muthukumaraswamy, S.D., Singh, K.D., 2013. The properties  
854 of induced gamma oscillations in human visual cortex show individual variability in their  
855 dependence on stimulus size. *Neuroimage* 68, 83-92.
- 856 Perry, G., Randle, J.M., Koelewijn, L., Routley, B.C., Singh, K.D., 2015. Linear Tuning of Gamma  
857 Amplitude and Frequency to Luminance Contrast: Evidence from a Continuous Mapping  
858 Paradigm. *Plos One*.
- 859 Ray, S., Maunsell, J.H.R., 2015. Do gamma oscillations play a role in cerebral cortex? *Trends in*  
860 *Cognitive Sciences* 19, 78-85.
- 861 Rubin, D.B., Van Hooser, S.D., Miller, K.D., 2015. The Stabilized Supralinear Network: A Unifying  
862 Circuit Motif Underlying Multi-Input Integration in Sensory Cortex. *Neuron* 85, 402-417.
- 863 Sachdev, R.N.S., Krause, M.R., Mazer, J.A., 2012. Surround suppression and sparse coding in visual  
864 and barrel cortices. *Frontiers in Neural Circuits*.
- 865 Schallmo, M.P., Kale, A.M., Millin, R., Flevaris, A.V., Brkanac, Z., Edden, R.A., Bernier, R.A., Murray,  
866 S.O., 2018. Suppression and facilitation of human neural responses. *Elife*.
- 867 Schwarzkopf, D.S., Robertson, D.J., Song, C., Barnes, G.R., Rees, G., 2012. The frequency of visually  
868 induced gamma-band oscillations depends on the size of early human visual cortex. *J*  
869 *Neurosci* 32, 1507-1512.
- 870 Shushruth, S., Mangapathy, P., Ichida, J.M., Bressloff, P.C., Schwabe, L., Angelucci, A., 2012. Strong  
871 Recurrent Networks Compute the Orientation Tuning of Surround Modulation in the Primate  
872 Primary Visual Cortex. *J Neurosci* 32, 308-321.
- 873 Sohal, V.S., Zhang, F., Yizhar, O., Deisseroth, K., 2009. Parvalbumin neurons and gamma rhythms  
874 enhance cortical circuit performance. *Nature* 459, 698-702.
- 875 Stroganova, T.A., Sysoeva, O.V., Davletshina, M.S., Galuta, I.A., Goiaeva, D.E., Prokofyev, A.O.,  
876 Orekhova, E.V., 2018. MEG Gamma Oscillations and Directional Sensitivity to Visual Motion in  
877 Children with ASD: Two Sides of the Inhibition Deficit. *INSAR 2018 Annual Meeting*.  
878 International Society for Autism Research, Rotterdam, Netherlands.
- 879 Sysoeva, O.V., Galuta, I.A., Davletshina, M.S., Orekhova, E.V., Stroganova, T.A., 2017. Abnormal Size-  
880 Dependent Modulation of Motion Perception in Children with Autism Spectrum Disorder  
881 (ASD). *Front Neurosci* 11, 164.
- 882 Szucs, D., Ioannidis, J.P.A., 2017. Empirical assessment of published effect sizes and power in the  
883 recent cognitive neuroscience and psychology literature. *Plos Biology*.

- 884 Tadin, D., 2015. Suppressive mechanisms in visual motion processing: From perception to  
885 intelligence. *Vision Research* 115, 58-70.
- 886 Tadin, D., Kim, J., Doop, M.L., Gibson, C., Lappin, J.S., Blake, R., Park, S., 2006. Weakened center-  
887 surround interactions in visual motion processing in schizophrenia. *J Neurosci* 26, 11403-  
888 11412.
- 889 Tadin, D., Lappin, J.S., Gilroy, L.A., Blake, R., 2003. Perceptual consequences of centre-surround  
890 antagonism in visual motion processing. *Nature* 424, 312-315.
- 891 Tadin, D., Park, W.J., Dieter, K.C., Melnick, M.D., Lappin, J.S., Blake, R., 2019. Spatial suppression  
892 promotes rapid figure-ground segmentation of moving objects. *Nature Communications*.
- 893 Tadin, D., Silvanto, J., Pascual-Leone, A., Battelli, L., 2011. Improved Motion Perception and  
894 Impaired Spatial Suppression following Disruption of Cortical Area MT/V5. *J Neurosci* 31,  
895 1279-1283.
- 896 Takada, N., Pi, H.J., Sousa, V.H., Waters, J., Fishell, G., Kepecs, A., Osten, P., 2014. A developmental  
897 cell-type switch in cortical interneurons leads to a selective defect in cortical oscillations.  
898 *Nature Communications*.
- 899 Tan, H.R.M., Gross, J., Uhlhaas, P.J., 2016. MEG sensor and source measures of visually induced  
900 gamma-band oscillations are highly reliable. *Neuroimage* 137, 34-44.
- 901 Taulu, S., Hari, R., 2009. Removal of magnetoencephalographic artifacts with temporal signal-  
902 space separation: demonstration with single-trial auditory-evoked responses. *Hum Brain*  
903 *Mapp* 30, 1524-1534.
- 904 Troche, S.J., Thomas, P., Tadin, D., Rammsayer, T.H., 2018. On the relationship between spatial  
905 suppression, speed of information processing, and psychometric intelligence. *Intelligence* 67,  
906 11-18.
- 907 van Pelt, S., Boomsma, D.I., Fries, P., 2012. Magnetoencephalography in Twins Reveals a Strong  
908 Genetic Determination of the Peak Frequency of Visually Induced Gamma-Band  
909 Synchronization. *J Neurosci* 32, 3388-3392.
- 910 van Pelt, S., Fries, P., 2013. Visual stimulus eccentricity affects human gamma peak frequency.  
911 *Neuroimage* 78, 439-447.
- 912 van Pelt, S., Shumskaya, E., Fries, P., 2018. Cortical volume and sex influence visual gamma.  
913 *Neuroimage* 178, 702-712.
- 914 Whithain, E.M., Pope, K.J., Fitzgibbon, S.P., Lewis, T., Clark, C.R., Loveless, S., Broberg, M., Wallace,  
915 A., DeLosAngeles, D., Lillie, P., Hardy, A., Fronsco, R., Pulbrook, A., Willoughby, J.O., 2007.  
916 Scalp electrical recording during paralysis: Quantitative evidence that EEG frequencies above  
917 20 Hz are contaminated by EMG. *Clinical Neurophysiology* 118, 1877-1888.
- 918 Whitham, E.M., Lewis, T., Pope, K.J., Fitzgibbon, S.P., Clark, C.R., Loveless, S., DeLosAngeles, D.,  
919 Wallace, A.K., Broberg, M., Willoughby, J.O., 2008. Thinking activates EMG in scalp electrical  
920 recordings. *Clinical Neurophysiology* 119, 1166-1175.
- 921 Zhu, M.C., Rozell, C.J., 2013. Visual Nonclassical Receptive Field Effects Emerge from Sparse  
922 Coding in a Dynamical System. *Plos Computational Biology*.
- 923
